# Supplementary material for: Hierarchical nanostructures of cupric oxide on a copper substrate: controllable morphology and wettability
Source: Royal Society of Chemistry journal article supplement (doi:10.1039/b611691d), 2006-01-01

## Supplementary Information

### Hierarchical nanostructures of cupric oxide on a copper substrate: controllable morphology and wettability

Jinping Liu,<sup>\*a</sup> Xintang Huang,<sup>\*a</sup> Yuanyuan Li,<sup>a</sup> K. M. Sulieman,<sup>a</sup> Xiang He<sup>b</sup> and  
Fenglou Sun<sup>b</sup>

<sup>a</sup> Department of Physics, Central China Normal University, Wuhan, Hubei 430079, P. R. China.  
E-mail: xthuang@phy.ccnu.edu.cn(X. Huang), ljpphyccnu@mails.ccnu.edu.cn(J. Liu); Fax: 0086  
027 67861185.

<sup>b</sup> Plasma Institute, South-Central University for Nationalities, Wuhan, Hubei 430074, P. R. China.

**Fig. S1.** HRTEM image taken from a number of CuO nanocrystals shown in Fig.3a.

**Fig. S2.** SEM image of nanosheet-based complex films on an aluminum substrate: (a) Low-magnification; (b) An individual “papilla”. The film was obtained by immersing aluminum into hot ammonia solution.

***Fig. S1***

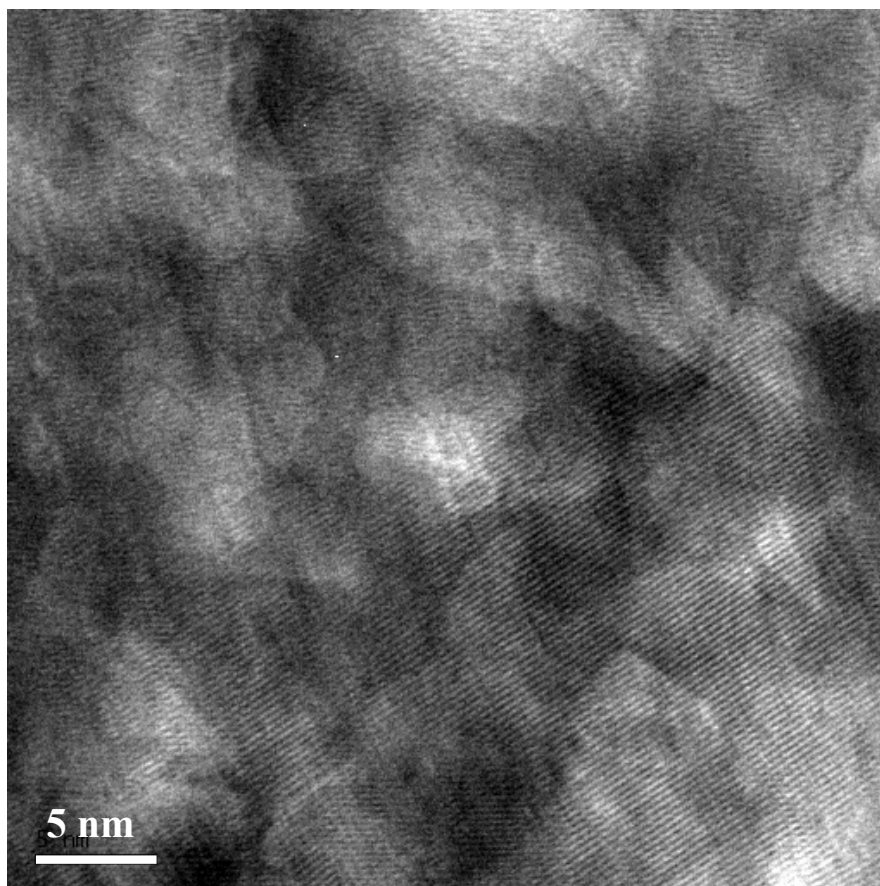

**Fig. S2**

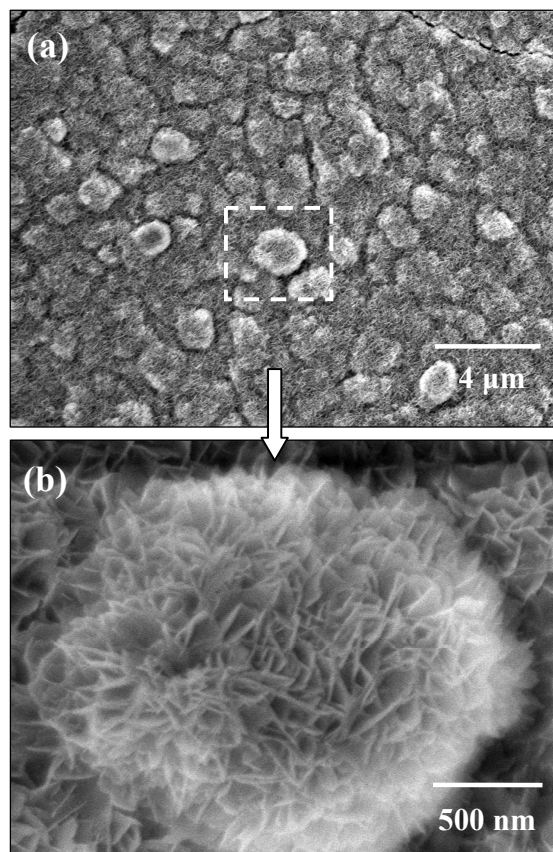

Supplement: b611691d.pdf [file b611691d.pdf]
